# Supplementary material for: Solvent-controlled synthesis of an Al12-oxo molecular ring and Al24-oxo truncated metallo-cube
Source: Royal Society of Chemistry journal article supplement (doi:10.1039/d2qi02461f), 2023-01-01
Supplement: d2qi02461f1.pdf [file d2qi02461f1.pdf]

## **Electronic Supplementary Information (ESI)**

### **The solvent-controlled $\text{Al}_{12}$ -Oxo molecular ring and $\text{Al}_{24}$ -Oxo truncated metallo-cube**

Ying Zou,<sup>a</sup> Wei Lv,<sup>a</sup> Zhen-Zhen Xue,<sup>a</sup> Jin-Hua Li<sup>a</sup>, Xiao-Yu Li,<sup>\*a</sup> and Guo-Ming Wang<sup>\*a</sup>

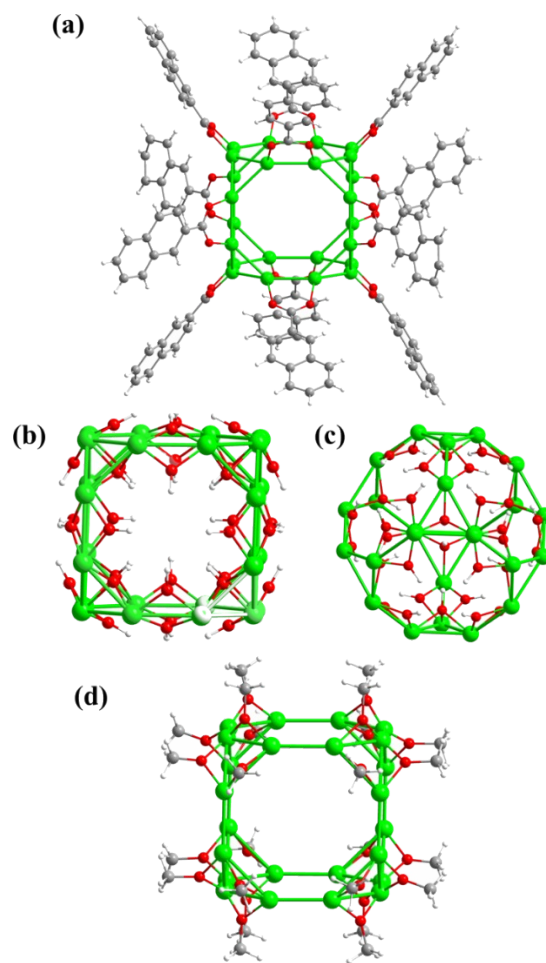

**Fig. S1 The coordinated spatial positions of NAP<sup>-</sup> ligands, OH<sup>-</sup> and CH<sub>3</sub>O<sup>-</sup> in Al<sub>24</sub> cluster.**

**Table S1. The formulas assignment of two sets of species of the negative-ion ESI-MS of Al<sub>24</sub> in CH<sub>3</sub>OH/CH<sub>2</sub>Cl<sub>2</sub> solution.**

| Species | Peak assignment                                                                                                                                                           | Exp. <i>m/z</i> | Sim. <i>m/z</i> |
|---------|---------------------------------------------------------------------------------------------------------------------------------------------------------------------------|-----------------|-----------------|
| 1a      | [Al <sub>24</sub> (OH) <sub>34</sub> (CH <sub>3</sub> O) <sub>26</sub> (NAP) <sub>11</sub> (H <sub>2</sub> O) <sub>4</sub> Cl <sub>3</sub> ] <sup>2-</sup>                | 2045.78         | 2045.70         |
| 1b      | [Al <sub>24</sub> (OH) <sub>34</sub> (CH <sub>3</sub> O) <sub>23</sub> (NAP) <sub>11</sub> (H <sub>2</sub> O) <sub>4</sub> Cl <sub>6</sub> ] <sup>2-</sup>                | 2052.20         | 2052.21         |
| 1c      | [Al <sub>24</sub> (OH) <sub>32</sub> (CH <sub>3</sub> O) <sub>28</sub> (NAP) <sub>11</sub> (H <sub>2</sub> O) <sub>4</sub> Cl <sub>3</sub> ] <sup>2-</sup>                | 2059.79         | 2059.72         |
| 1d      | [Al <sub>24</sub> (OH) <sub>32</sub> (CH <sub>3</sub> O) <sub>25</sub> (NAP) <sub>11</sub> (H <sub>2</sub> O) <sub>4</sub> Cl <sub>6</sub> ] <sup>2-</sup>                | 2066.22         | 2066.27         |
| 1e      | [Al <sub>24</sub> (OH) <sub>31</sub> (CH <sub>3</sub> O) <sub>30</sub> (NAP) <sub>11</sub> (H <sub>2</sub> O) <sub>1</sub> Cl <sub>4</sub> H <sub>2</sub> ] <sup>2-</sup> | 2073.79         | 2073.74         |
| 1f      | [Al <sub>24</sub> (OH) <sub>31</sub> (CH <sub>3</sub> O) <sub>31</sub> (NAP) <sub>11</sub> Cl <sub>4</sub> H <sub>3</sub> ] <sup>2-</sup>                                 | 2080.79         | 2080.75         |
| 1g      | [Al <sub>24</sub> (OH) <sub>34</sub> (CH <sub>3</sub> O) <sub>23</sub> (NAP) <sub>11</sub> (H <sub>2</sub> O) <sub>6</sub> Cl <sub>7</sub> H <sub>1</sub> ] <sup>2-</sup> | 2088.20         | 2088.25         |
| 2a      | [Al <sub>22</sub> (OH) <sub>23</sub> (CH <sub>3</sub> O) <sub>25</sub> (NAP) <sub>12</sub> (H <sub>2</sub> O) <sub>2</sub> Cl <sub>7</sub> ] <sup>-</sup>                 | 4097.45         | 4097.41         |
| 2b      | [Al <sub>22</sub> (OH) <sub>23</sub> (CH <sub>3</sub> O) <sub>26</sub> (NAP) <sub>12</sub> (H <sub>2</sub> O) <sub>1</sub> Cl <sub>7</sub> H <sub>1</sub> ] <sup>-</sup>  | 4111.47         | 4111.43         |
| 2c      | [Al <sub>22</sub> (OH) <sub>23</sub> (CH <sub>3</sub> O) <sub>27</sub> (NAP) <sub>12</sub> Cl <sub>7</sub> H <sub>2</sub> ] <sup>-</sup>                                  | 4125.48         | 4125.44         |

**Table S2. The formulas assignment of two sets of species of the positive-ion ESI-MS of Al<sub>24</sub> in CH<sub>3</sub>OH/CH<sub>2</sub>Cl<sub>2</sub> solution.**

| Species | Peak assignment                                                                                                                                                                                                                               | Exp.m/z | Sim.m/z |
|---------|-----------------------------------------------------------------------------------------------------------------------------------------------------------------------------------------------------------------------------------------------|---------|---------|
| 1a      | [Al <sub>24</sub> (OH) <sub>32</sub> (CH <sub>3</sub> O) <sub>25</sub> (NAP) <sub>10</sub> Cl <sub>5</sub> (H <sub>2</sub> O) <sub>5</sub> H <sub>2</sub> ] <sup>2+</sup>                                                                     | 1974.24 | 1974.23 |
| 1b      | [Al <sub>24</sub> (OH) <sub>32</sub> (CH <sub>3</sub> O) <sub>26</sub> (NAP) <sub>10</sub> Cl <sub>5</sub> (H <sub>2</sub> O) <sub>4</sub> H <sub>3</sub> ] <sup>2+</sup>                                                                     | 1981.25 | 1981.25 |
| 1c      | [Al <sub>24</sub> (OH) <sub>32</sub> (CH <sub>3</sub> O) <sub>26</sub> (NAP) <sub>10</sub> Cl <sub>5</sub> (H <sub>2</sub> O) <sub>3</sub> (CH <sub>3</sub> OH) <sub>1</sub> H <sub>3</sub> ] <sup>2+</sup>                                   | 1988.26 | 1988.25 |
| 1d      | [Al <sub>24</sub> (OH) <sub>32</sub> (CH <sub>3</sub> O) <sub>26</sub> (NAP) <sub>10</sub> Cl <sub>5</sub> (H <sub>2</sub> O) <sub>2</sub> CH <sub>3</sub> OH) <sub>2</sub> H <sub>3</sub> ] <sup>2+</sup>                                    | 1995.27 | 1995.26 |
| 1e      | [Al <sub>24</sub> (OH) <sub>32</sub> (CH <sub>3</sub> O) <sub>26</sub> (NAP) <sub>10</sub> Cl <sub>5</sub> (H <sub>2</sub> O) <sub>1</sub> (CH <sub>3</sub> OH) <sub>3</sub> H <sub>3</sub> ] <sup>2+</sup>                                   | 2002.28 | 2002.26 |
| 1f      | [Al <sub>24</sub> (OH) <sub>32</sub> (CH <sub>3</sub> O) <sub>26</sub> (NAP) <sub>10</sub> Cl <sub>5</sub> (CH <sub>3</sub> OH) <sub>4</sub> H <sub>3</sub> ] <sup>2+</sup>                                                                   | 2009.28 | 2009.27 |
| 2a      | [Al <sub>24</sub> (OH) <sub>32</sub> (CH <sub>3</sub> O) <sub>26</sub> (NAP) <sub>10</sub> Cl <sub>5</sub> (H <sub>2</sub> O) <sub>1</sub> (CH <sub>3</sub> CN) <sub>2</sub> (CH <sub>3</sub> OH) <sub>3</sub> H <sub>3</sub> ] <sup>2+</sup> | 2043.29 | 2043.29 |
| 2b      | [Al <sub>24</sub> (OH) <sub>32</sub> (CH <sub>3</sub> O) <sub>26</sub> (NAP) <sub>10</sub> Cl <sub>5</sub> (CH <sub>3</sub> CN) <sub>2</sub> (CH <sub>3</sub> OH) <sub>4</sub> H <sub>3</sub> ] <sup>2+</sup>                                 | 2050.30 | 2050.30 |
| 2c      | [Al <sub>24</sub> (OH) <sub>32</sub> (CH <sub>3</sub> O) <sub>24</sub> (NAP) <sub>12</sub> Cl <sub>2</sub> (H <sub>2</sub> O) <sub>3</sub> ] <sup>2+</sup>                                                                                    | 2057.31 | 2057.30 |
| 2d      | [Al <sub>24</sub> (OH) <sub>32</sub> (CH <sub>3</sub> O) <sub>24</sub> (NAP) <sub>12</sub> Cl <sub>2</sub> (H <sub>2</sub> O) <sub>2</sub> (CH <sub>3</sub> OH) <sub>1</sub> ] <sup>2+</sup>                                                  | 2064.32 | 2064.30 |
| 2e      | [Al <sub>24</sub> (OH) <sub>32</sub> (CH <sub>3</sub> O) <sub>24</sub> (NAP) <sub>12</sub> Cl <sub>2</sub> (H <sub>2</sub> O) <sub>1</sub> (CH <sub>3</sub> OH) <sub>2</sub> ] <sup>2+</sup>                                                  | 2071.33 | 2071.31 |
| 2f      | [Al <sub>24</sub> (OH) <sub>32</sub> (CH <sub>3</sub> O) <sub>24</sub> (NAP) <sub>12</sub> Cl <sub>2</sub> (CH <sub>3</sub> OH) <sub>3</sub> ] <sup>2+</sup>                                                                                  | 2078.33 | 2078.32 |
| 2g      | [Al <sub>24</sub> (OH) <sub>32</sub> (CH <sub>3</sub> O) <sub>25</sub> (NAP) <sub>12</sub> Cl <sub>1</sub> (H <sub>2</sub> O) <sub>1</sub> (CH <sub>3</sub> OH) <sub>3</sub> ] <sup>2+</sup>                                                  | 2085.34 | 2085.35 |
| 3a      | [Al <sub>24</sub> (OH) <sub>32</sub> (CH <sub>3</sub> O) <sub>24</sub> (NAP) <sub>12</sub> Cl <sub>2</sub> (H <sub>2</sub> O) <sub>5</sub> (CH <sub>3</sub> CN) <sub>1</sub> (CH <sub>3</sub> OH) <sub>1</sub> ] <sup>2+</sup>                | 2111.84 | 2111.83 |
| 3b      | [Al <sub>24</sub> (OH) <sub>32</sub> (CH <sub>3</sub> O) <sub>24</sub> (NAP) <sub>12</sub> Cl <sub>2</sub> (H <sub>2</sub> O) <sub>3</sub> (CH <sub>3</sub> CN) <sub>3</sub> ] <sup>2+</sup>                                                  | 2119.35 | 2119.34 |
| 3c      | [Al <sub>24</sub> (OH) <sub>32</sub> (CH <sub>3</sub> O) <sub>24</sub> (NAP) <sub>12</sub> Cl <sub>2</sub> (H <sub>2</sub> O) <sub>2</sub> (CH <sub>3</sub> CN) <sub>3</sub> (CH <sub>3</sub> OH) <sub>1</sub> ] <sup>2+</sup>                | 2126.36 | 2126.35 |
| 3d      | [Al <sub>24</sub> (OH) <sub>32</sub> (CH <sub>3</sub> O) <sub>24</sub> (NAP) <sub>12</sub> Cl <sub>3</sub> (H <sub>2</sub> O) <sub>4</sub> (CH <sub>3</sub> OH) <sub>3</sub> H <sub>1</sub> ]                                                 | 2132.87 | 2132.83 |

|    |                                                                                                                                                                                                                                                   |         |         |
|----|---------------------------------------------------------------------------------------------------------------------------------------------------------------------------------------------------------------------------------------------------|---------|---------|
|    | 2+                                                                                                                                                                                                                                                |         |         |
| 3e | [Al <sub>24</sub> (OH) <sub>32</sub> (CH <sub>3</sub> O) <sub>24</sub> (NAP) <sub>12</sub> Cl <sub>4</sub> (H <sub>2</sub> O) <sub>1</sub> (CH <sub>3</sub> OH) <sub>4</sub> H <sub>2</sub> ]<br>2+                                               | 2140.38 | 2140.32 |
| 3f | [Al <sub>24</sub> (OH) <sub>32</sub> (CH <sub>3</sub> O) <sub>24</sub> (NAP) <sub>12</sub> Cl <sub>4</sub> (CH <sub>3</sub> OH) <sub>5</sub> H <sub>2</sub> ] <sup>2+</sup>                                                                       | 2147.38 | 2147.32 |
| 3g | [Al <sub>24</sub> (OH) <sub>32</sub> (CH <sub>3</sub> O) <sub>25</sub> (NAP) <sub>11</sub> Cl <sub>4</sub> (H <sub>2</sub> O) <sub>3</sub> (CH <sub>3</sub> CN) <sub>4</sub> (C<br>H <sub>3</sub> OH) <sub>3</sub> H <sub>2</sub> ] <sup>2+</sup> | 2154.39 | 2154.35 |
| 4a | [Al <sub>24</sub> (OH) <sub>32</sub> (CH <sub>3</sub> O) <sub>24</sub> (NAP) <sub>12</sub> Cl <sub>2</sub> (H <sub>2</sub> O) <sub>3</sub> (CH <sub>3</sub> CN) <sub>4</sub> (C<br>H <sub>3</sub> OH) <sub>3</sub> ] <sup>2+</sup>                | 2187.90 | 2187.89 |
| 4b | [Al <sub>24</sub> (OH) <sub>32</sub> (CH <sub>3</sub> O) <sub>24</sub> (NAP) <sub>12</sub> Cl <sub>2</sub> (H <sub>2</sub> O) <sub>2</sub> (CH <sub>3</sub> CN) <sub>4</sub> (C<br>H <sub>3</sub> OH) <sub>4</sub> ] <sup>2+</sup>                | 2194.91 | 2194.90 |
| 4c | [Al <sub>24</sub> (OH) <sub>32</sub> (CH <sub>3</sub> O) <sub>24</sub> (NAP) <sub>12</sub> Cl <sub>2</sub> (H <sub>2</sub> O) <sub>1</sub> (CH <sub>3</sub> CN) <sub>4</sub> (C<br>H <sub>3</sub> OH) <sub>5</sub> ] <sup>2+</sup>                | 2201.91 | 2201.91 |
| 4d | [Al <sub>24</sub> (OH) <sub>32</sub> (CH <sub>3</sub> O) <sub>24</sub> (NAP) <sub>12</sub> Cl <sub>2</sub> (CH <sub>3</sub> CN) <sub>4</sub> (CH <sub>3</sub> OH) <sub>6</sub><br>] <sup>2+</sup>                                                 | 2208.92 | 2208.91 |
| 4e | [Al <sub>24</sub> (OH) <sub>32</sub> (CH <sub>3</sub> O) <sub>24</sub> (NAP) <sub>13</sub> Cl <sub>1</sub> (H <sub>2</sub> O) <sub>6</sub> (CH <sub>3</sub> OH) <sub>4</sub> ] <sup>2+</sup>                                                      | 2216.43 | 2216.40 |

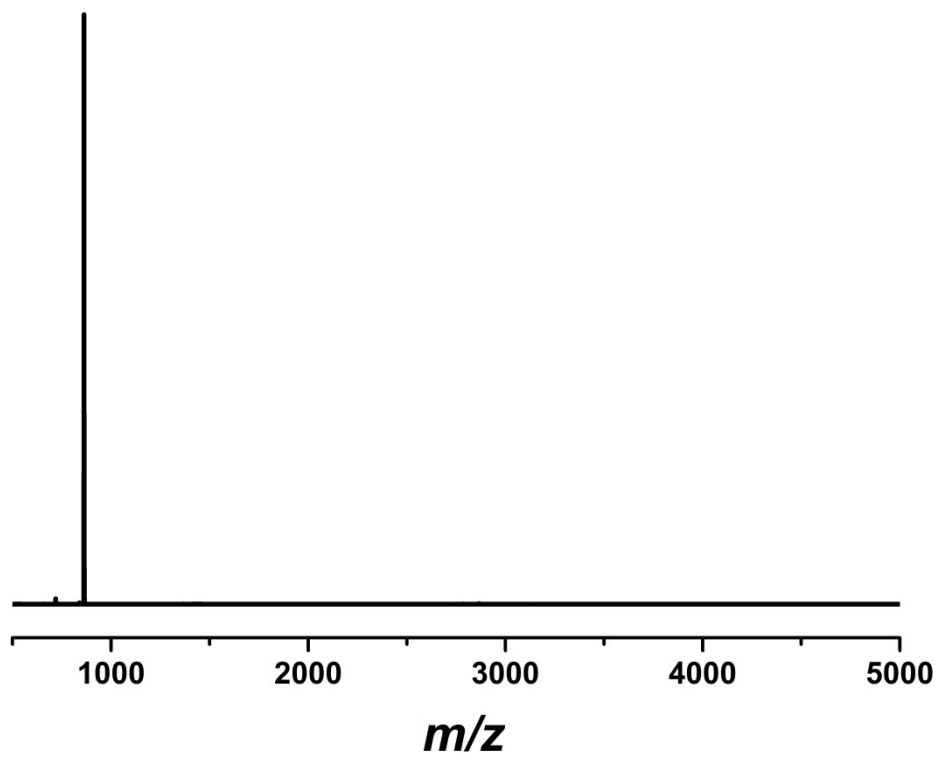

**Fig. S2** The negative-ion ESI-MS of  $\text{Al}_{12}$  in  $\text{CH}_3\text{OH}/\text{CH}_2\text{Cl}_2$

**Table S3. The formulas assignment of two sets of species of Al<sub>12</sub> in CH<sub>3</sub>OH/CH<sub>2</sub>Cl<sub>2</sub> solution.**

| Species | Peak assignment                                                                                                                        | Exp.m/z | Sim.m/z |
|---------|----------------------------------------------------------------------------------------------------------------------------------------|---------|---------|
| 1a      | [Al <sub>12</sub> (CH <sub>3</sub> O) <sub>17</sub> (NAP) <sub>17</sub> (H <sub>2</sub> O) <sub>8</sub> ] <sup>2+</sup>                | 1953.40 | 1953.48 |
| 1b      | [Al <sub>12</sub> (CH <sub>3</sub> O) <sub>16</sub> (NAP) <sub>18</sub> (H <sub>2</sub> O) <sub>1</sub> ] <sup>2+</sup>                | 1960.40 | 1960.45 |
| 1c      | [Al <sub>12</sub> (CH <sub>3</sub> O) <sub>17</sub> (NAP) <sub>18</sub> H <sub>1</sub> ] <sup>2+</sup>                                 | 1967.40 | 1967.46 |
| 1d      | [Al <sub>12</sub> (CH <sub>3</sub> O) <sub>20</sub> (NAP) <sub>17</sub> (H <sub>2</sub> O) <sub>5</sub> H <sub>3</sub> ] <sup>2+</sup> | 1974.42 | 1974.50 |
| 1e      | [Al <sub>12</sub> (CH <sub>3</sub> O) <sub>21</sub> (NAP) <sub>17</sub> (H <sub>2</sub> O) <sub>4</sub> H <sub>4</sub> ] <sup>2+</sup> | 1981.43 | 1981.51 |
| 1f      | [Al <sub>11</sub> (CH <sub>3</sub> O) <sub>12</sub> (NAP) <sub>19</sub> (H <sub>2</sub> O) <sub>3</sub> ] <sup>2+</sup>                | 1988.42 | 1988.46 |
| 1g      | [Al <sub>11</sub> (CH <sub>3</sub> O) <sub>13</sub> (NAP) <sub>19</sub> (H <sub>2</sub> O) <sub>2</sub> H <sub>1</sub> ] <sup>2+</sup> | 1995.43 | 1995.47 |
| 1h      | [Al <sub>11</sub> (CH <sub>3</sub> O) <sub>14</sub> (NAP) <sub>19</sub> (H <sub>2</sub> O) <sub>1</sub> H <sub>2</sub> ] <sup>2+</sup> | 2002.44 | 2002.47 |
| 1i      | [Al <sub>11</sub> (CH <sub>3</sub> O) <sub>15</sub> (NAP) <sub>19</sub> H <sub>3</sub> ] <sup>2+</sup>                                 | 2009.44 | 2009.48 |
| 1j      | [Al <sub>10</sub> (CH <sub>3</sub> O) <sub>8</sub> (NAP) <sub>20</sub> (H <sub>2</sub> O) <sub>5</sub> ] <sup>2+</sup>                 | 2016.46 | 2016.50 |
| 2a      | [Al <sub>13</sub> (CH <sub>3</sub> O) <sub>20</sub> (NAP) <sub>19</sub> (H <sub>2</sub> O) <sub>1</sub> H <sub>2</sub> ] <sup>2+</sup> | 2122.54 | 2122.51 |
| 2b      | [Al <sub>13</sub> (CH <sub>3</sub> O) <sub>21</sub> (NAP) <sub>19</sub> H <sub>3</sub> ] <sup>2+</sup>                                 | 2129.55 | 2129.52 |
| 2c      | [Al <sub>12</sub> (CH <sub>3</sub> O) <sub>14</sub> (NAP) <sub>20</sub> (H <sub>2</sub> O) <sub>5</sub> ] <sup>2+</sup>                | 2136.56 | 2136.50 |
| 2d      | [Al <sub>12</sub> (CH <sub>3</sub> O) <sub>15</sub> (NAP) <sub>20</sub> (H <sub>2</sub> O) <sub>4</sub> H <sub>1</sub> ] <sup>2+</sup> | 2143.56 | 2143.51 |
| 2e      | [Al <sub>12</sub> (CH <sub>3</sub> O) <sub>16</sub> (NAP) <sub>20</sub> (H <sub>2</sub> O) <sub>3</sub> H <sub>2</sub> ] <sup>2+</sup> | 2150.57 | 2150.52 |
| 2f      | [Al <sub>12</sub> (CH <sub>3</sub> O) <sub>17</sub> (NAP) <sub>20</sub> (H <sub>2</sub> O) <sub>2</sub> H <sub>3</sub> ] <sup>2+</sup> | 2157.58 | 2157.52 |
| 3a      | [Al <sub>14</sub> (CH <sub>3</sub> O) <sub>20</sub> (NAP) <sub>20</sub> (H <sub>2</sub> O) <sub>9</sub> ] <sup>2+</sup>                | 2292.59 | 2292.56 |
| 3b      | [Al <sub>14</sub> (CH <sub>3</sub> O) <sub>21</sub> (NAP) <sub>20</sub> (H <sub>2</sub> O) <sub>8</sub> H <sub>1</sub> ] <sup>2+</sup> | 2299.58 | 2299.57 |
| 3c      | [Al <sub>14</sub> (CH <sub>3</sub> O) <sub>22</sub> (NAP) <sub>20</sub> (H <sub>2</sub> O) <sub>7</sub> H <sub>2</sub> ] <sup>2+</sup> | 2306.60 | 2306.57 |
| 3d      | [Al <sub>14</sub> (CH <sub>3</sub> O) <sub>23</sub> (NAP) <sub>20</sub> (H <sub>2</sub> O) <sub>6</sub> H <sub>3</sub> ] <sup>2+</sup> | 2313.60 | 2313.58 |
| 3e      | [Al <sub>14</sub> (CH <sub>3</sub> O) <sub>24</sub> (NAP) <sub>20</sub> (H <sub>2</sub> O) <sub>5</sub> H <sub>4</sub> ] <sup>2+</sup> | 2320.61 | 2320.59 |
| 3f      | [Al <sub>14</sub> (CH <sub>3</sub> O) <sub>25</sub> (NAP) <sub>20</sub> (H <sub>2</sub> O) <sub>4</sub> H <sub>5</sub> ] <sup>2+</sup> | 2327.62 | 2327.60 |

**Table S4. The hydrogen bond interactions of cluster Al<sub>24</sub>.**

| D-H     | <i>d</i> (D-H) | <i>d</i> (H···A) | <D-H-A | <i>d</i> (D···A) | A                        |
|---------|----------------|------------------|--------|------------------|--------------------------|
| O1-H1   | 0.95           | 2.321            | 161.53 | 3.236            | Cl2                      |
| O8-H8   | 0.95           | 2.353            | 163.88 | 3.276            | Cl1                      |
| O9-H9   | 0.95           | 2.301            | 162.68 | 3.22             | Cl1                      |
| O10-H10 | 0.95           | 2.318            | 163.89 | 3.241            | Cl2                      |
| O11-H11 | 0.95           | 2.337            | 163.44 | 3.259            | Cl2                      |
| O12-H12 | 0.95           | 2.331            | 163.05 | 3.251            | Cl2 [ -x+1, -y+1, -z+1 ] |
| O13-H13 | 0.95           | 2.345            | 165.17 | 3.272            | Cl3                      |
| O15-H15 | 0.95           | 2.379            | 164.55 | 3.304            | Cl3                      |
| O16-H16 | 0.95           | 2.3              | 165.46 | 3.228            | Cl1 [ -x+1, -y+1, -z+1 ] |
| O22-H22 | 0.95           | 2.296            | 162.42 | 3.214            | Cl3                      |
| O23-H23 | 0.95           | 2.325            | 161.25 | 3.239            | Cl1                      |
| O32-H32 | 0.95           | 2.26             | 161.17 | 3.174            | Cl3                      |



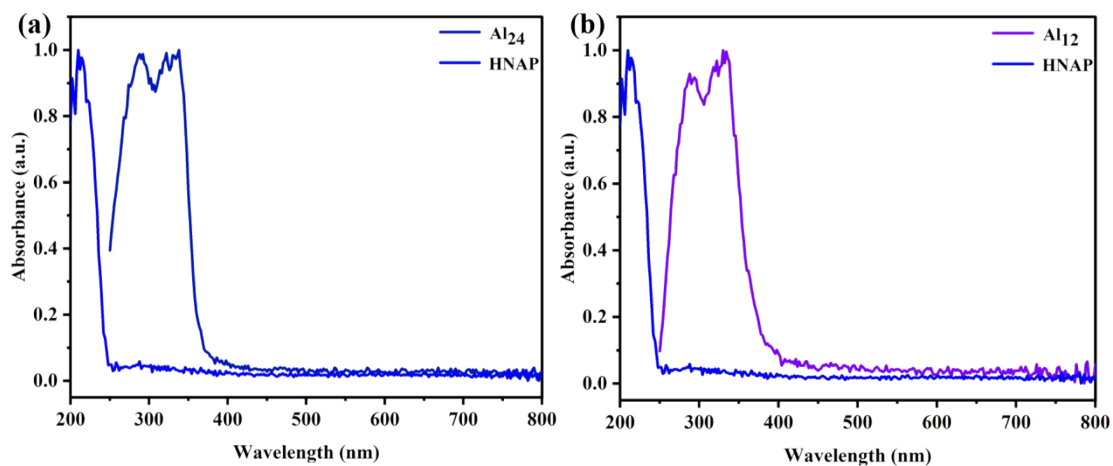

**Fig. S3** The solid-state ultraviolet-visible absorption spectra (UV-Vis) of HNAP and Al<sub>24</sub>, HNAP and Al<sub>12</sub> under room temperature.

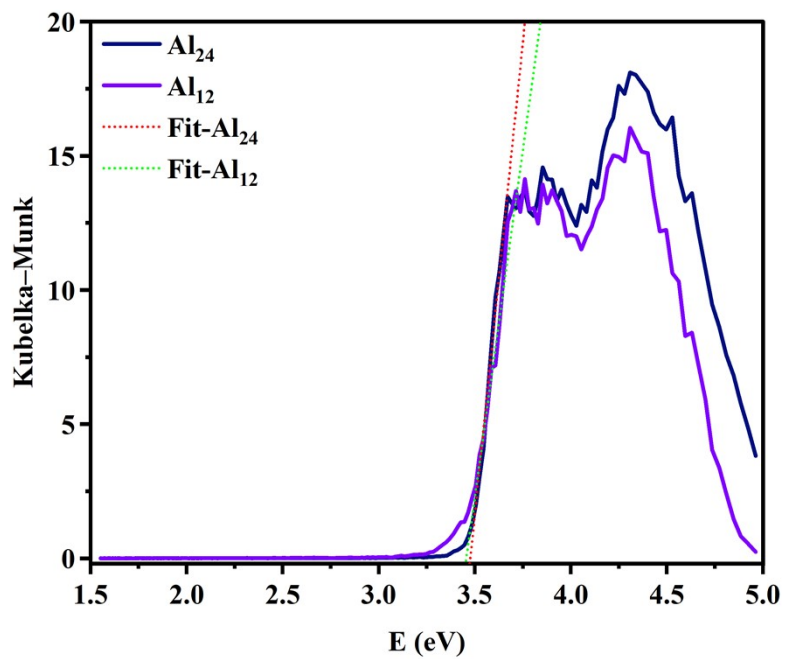

**Fig. S4 Absorption spectra of  $Al_{24}$  and  $Al_{12}$  derived from the diffuse reflectance spectra through Kubelka-Munk function.**

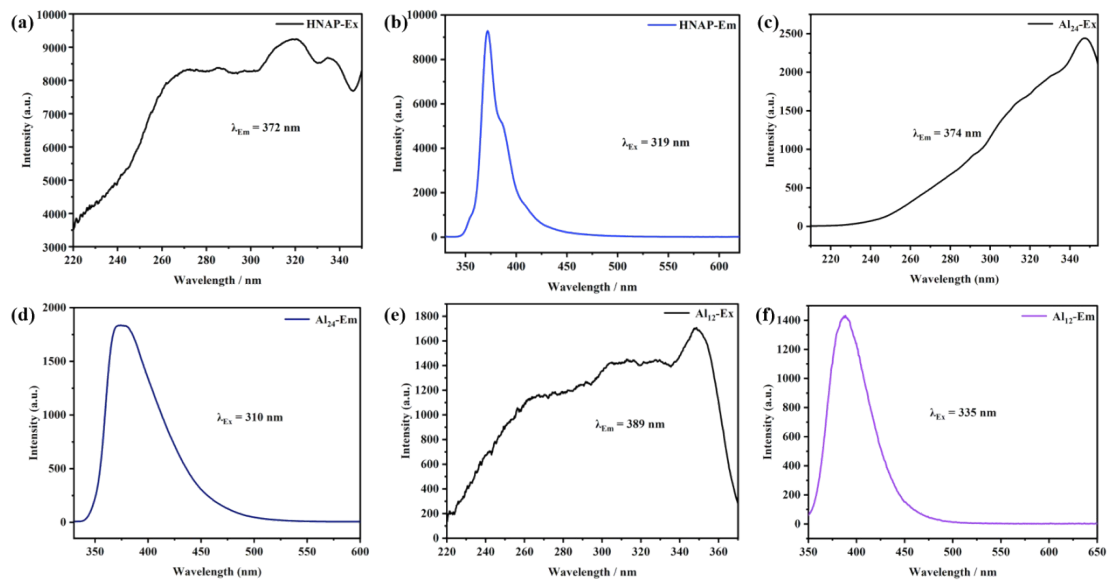

**Fig. S5** The emission and excitation spectra of the powder samples of **HNAP, Al<sub>24</sub> and Al<sub>12</sub>** under room temperature.

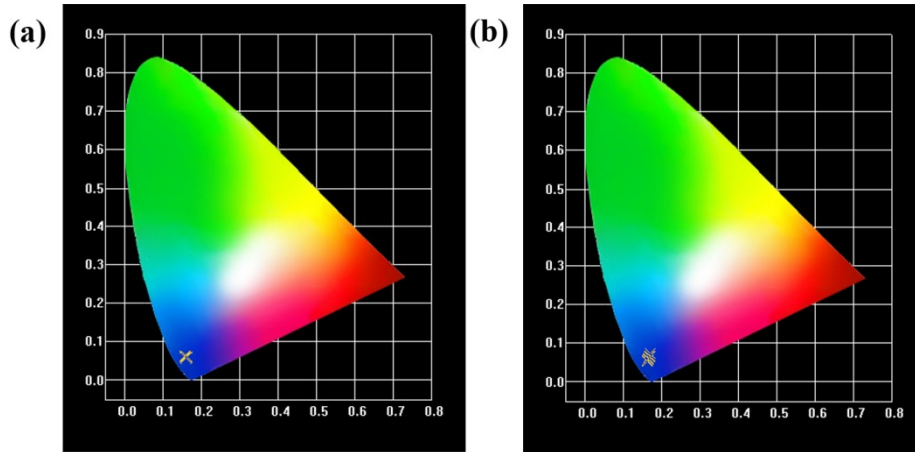

**Fig. S6 CIE chromatic coordinates of  $Al_{24}$ (a) and  $Al_{12}$ (b).**

**Table S5. The corresponding chromaticity coordinates of  $Al_{24}$  and  $Al_{12}$ .**

|      | $Al_{24}$ |        | $Al_{12}$ |        |
|------|-----------|--------|-----------|--------|
|      | x         | y      | x         | y      |
| 300K | 0.1571    | 0.0614 | 0.1623    | 0.053  |
| 270K | 0.1575    | 0.0588 | 0.1631    | 0.0525 |
| 240K | 0.158     | 0.0565 | 0.1637    | 0.0549 |
| 210K | 0.159     | 0.0555 | 0.1644    | 0.0572 |
| 180K | 0.1598    | 0.0548 | 0.1658    | 0.061  |
| 150K | 0.1609    | 0.0562 | 0.1672    | 0.0646 |
| 120K | 0.1618    | 0.0577 | 0.169     | 0.0695 |
| 90K  | 0.1625    | 0.0591 | 0.17      | 0.0726 |

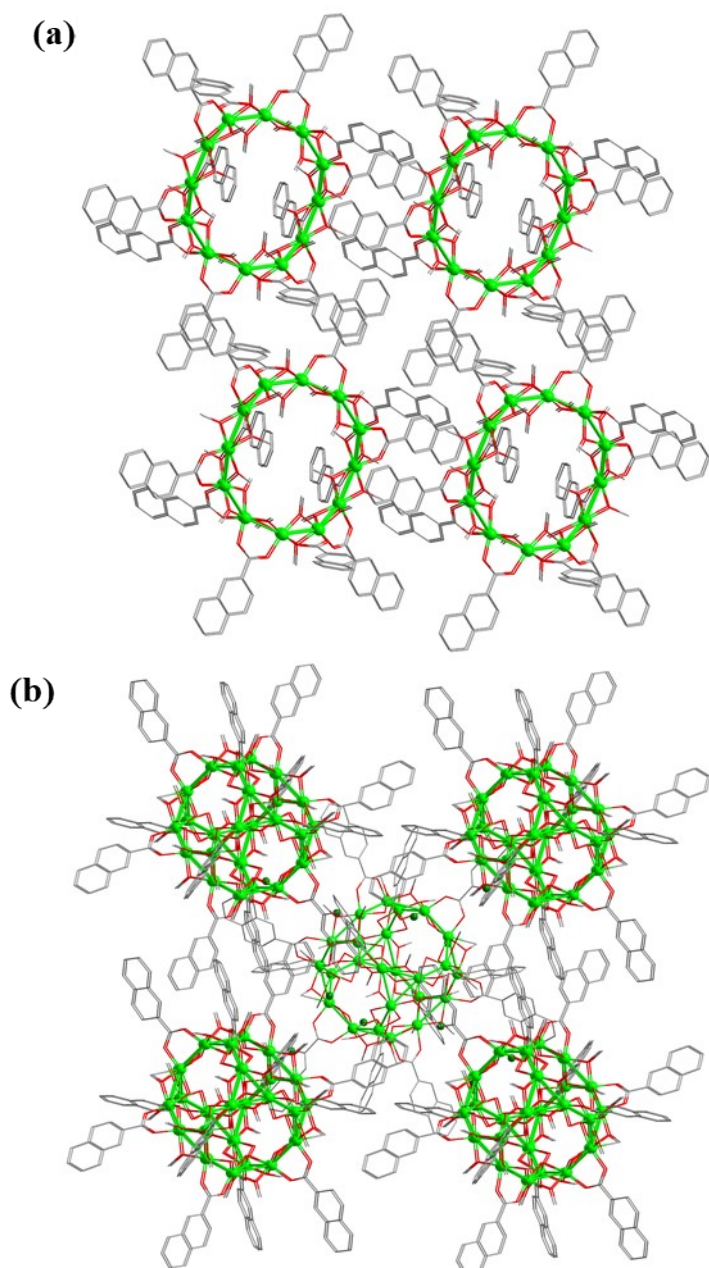

**Fig. S7** The packing structures of Al<sub>12</sub>(a) and Al<sub>24</sub>(b).

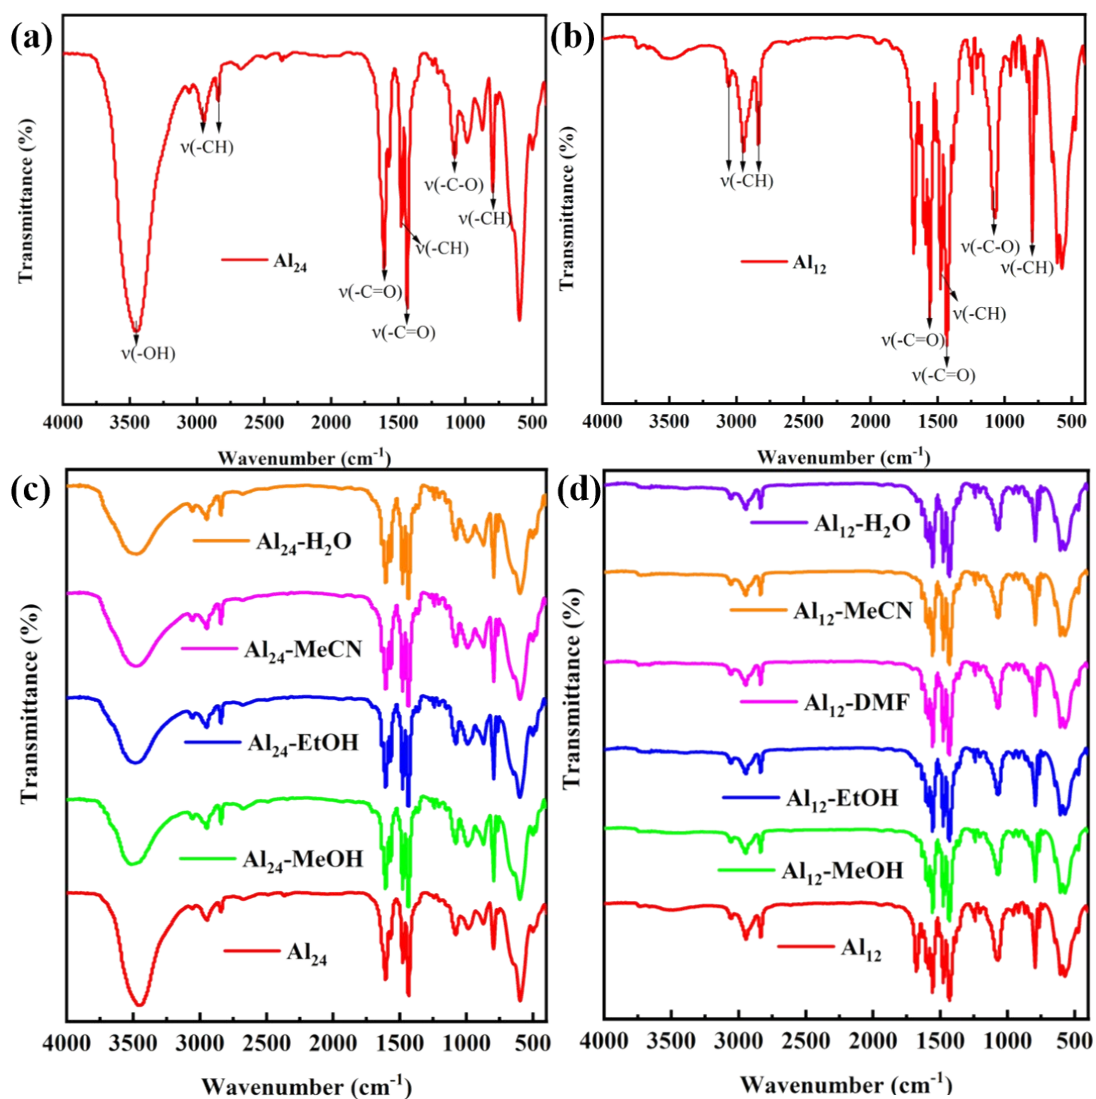

**Fig. S8** The IR spectra of  $\text{Al}_{24}$  (a),  $\text{Al}_{12}$  (b), and IR of the crystal after soaking in different solvents (c, d).

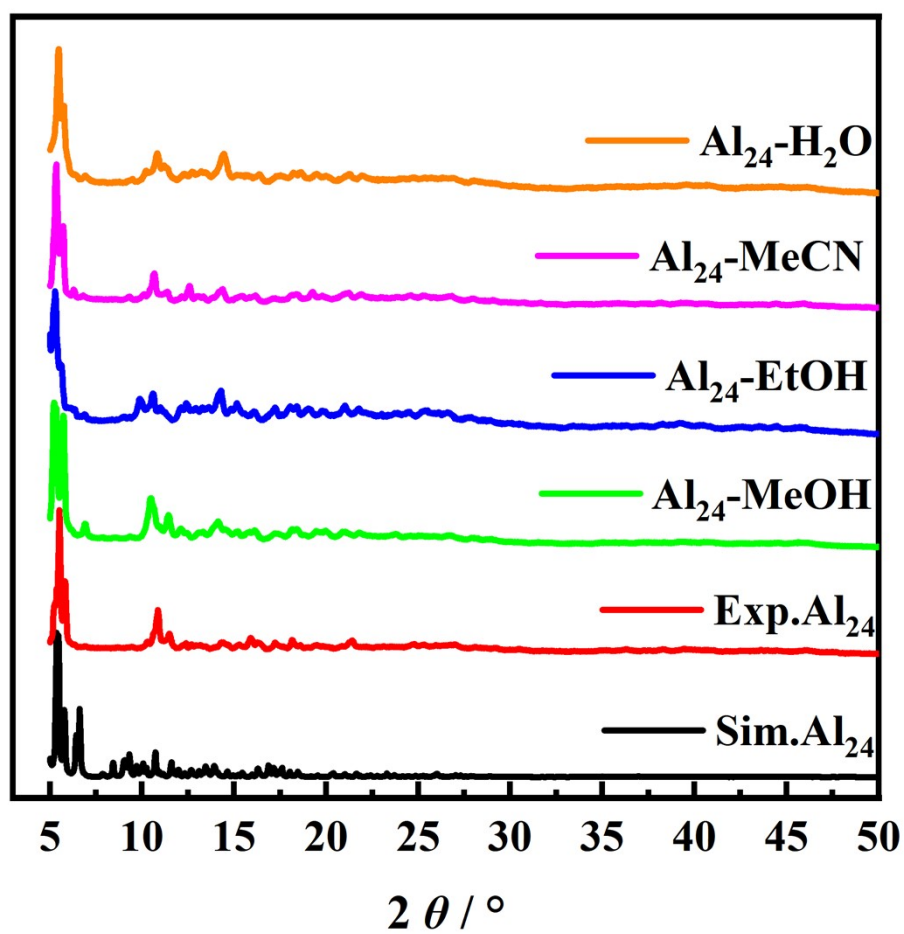

**Fig. S9** The simulated and experimental PXRD of  $\text{Al}_{24}$  and the crystal after soaking in different solvents for 24h.

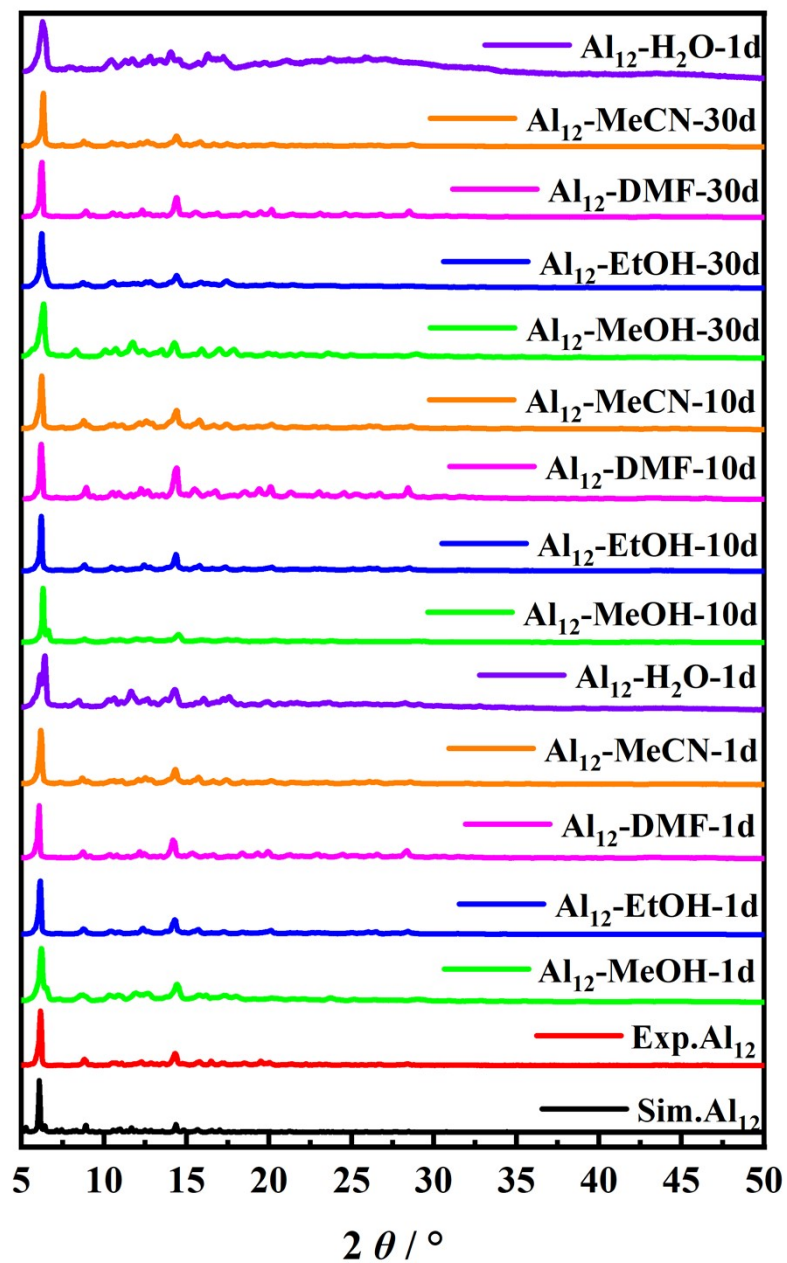

Fig. S10 The simulated and experimental PXRD of  $\text{Al}_{12}$  and the crystal after soaking in different solvents from 1d to 30d.



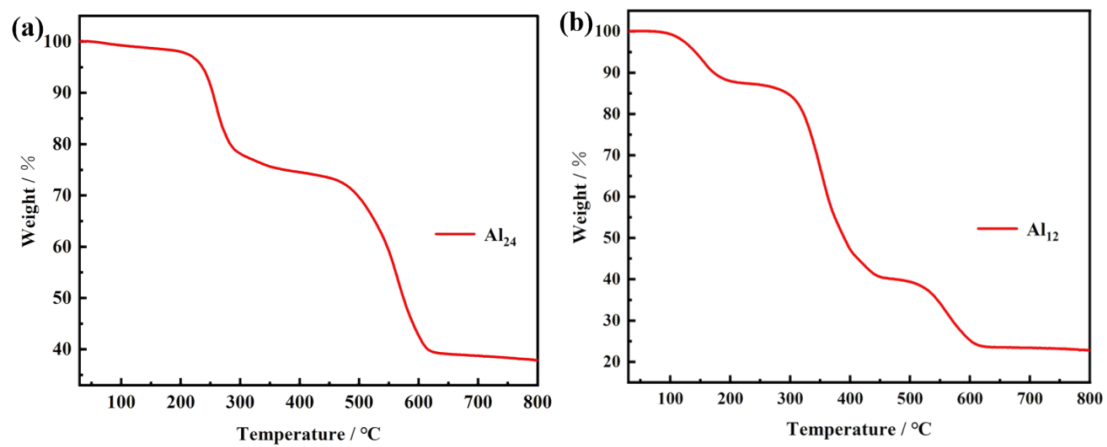

**Fig. S11** The TGA of  $\text{Al}_{24}$  and  $\text{Al}_{12}$ .

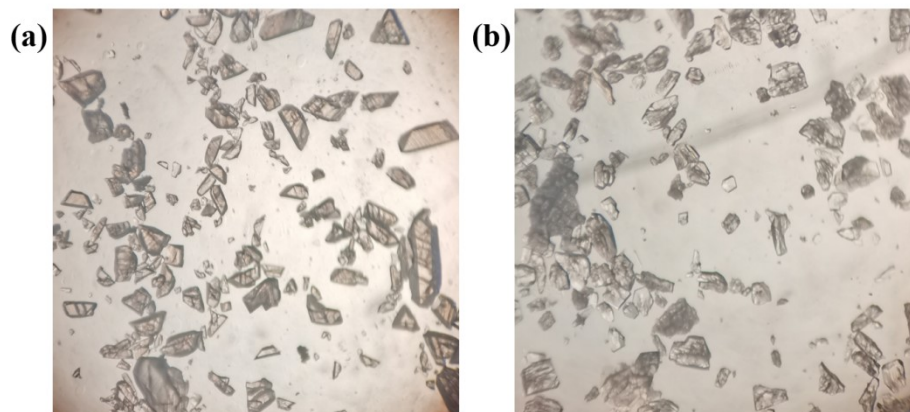

**Fig. S12** Microscope photographs of crystals of  $\text{Al}_{24}$ (a) and  $\text{Al}_{12}$ (b).

**Table S6. Crystal data for Al<sub>24</sub> and Al<sub>12</sub>.**

| Identification code                                          | Al <sub>24</sub>                                                                    | Al <sub>12</sub>                                                                    |
|--------------------------------------------------------------|-------------------------------------------------------------------------------------|-------------------------------------------------------------------------------------|
| Empirical formula                                            | C <sub>158</sub> H <sub>202</sub> Al <sub>24</sub> Cl <sub>6</sub> O <sub>84</sub>  | C <sub>170</sub> H <sub>196</sub> Al <sub>12</sub> N <sub>4</sub> O <sub>56</sub>   |
| Formula weight                                               | 4305.51                                                                             | 3515.14                                                                             |
| Temperature/K                                                | 120.00(10)                                                                          | 293(2)                                                                              |
| Crystal system                                               | monoclinic                                                                          | triclinic                                                                           |
| Space group                                                  | <i>P</i> 2 <sub>1</sub> / <i>n</i>                                                  | <i>P</i> -1                                                                         |
| <i>a</i> /Å                                                  | 22.4243(8)                                                                          | 14.9026(6)                                                                          |
| <i>b</i> /Å                                                  | 20.9573(4)                                                                          | 17.4708(5)                                                                          |
| <i>c</i> /Å                                                  | 26.8950(5)                                                                          | 18.5727(3)                                                                          |
| $\alpha$ /°                                                  | 90                                                                                  | 100.822(2)                                                                          |
| $\beta$ /°                                                   | 97.007(2)                                                                           | 92.904(2)                                                                           |
| $\gamma$ /°                                                  | 90                                                                                  | 101.735(3)                                                                          |
| Volume/Å <sup>3</sup>                                        | 12545.0(6)                                                                          | 4630.4(2)                                                                           |
| <i>Z</i>                                                     | 2                                                                                   | 1                                                                                   |
| $\rho_{\text{calc}}$ /cm <sup>3</sup>                        | 1.113                                                                               | 1.121                                                                               |
| $\mu$ /mm <sup>-1</sup>                                      | 2.06                                                                                | 1.196                                                                               |
| F(000)                                                       | 4356                                                                                | 1634.0                                                                              |
| Radiation                                                    | Cu K $\alpha$<br>( $\lambda$ = 1.54184)                                             | Cu K $\alpha$<br>( $\lambda$ = 1.54184)                                             |
| 2 $\theta$ range for data collection/°                       | 5.362 to 154.214                                                                    | 4.864 to 154.856                                                                    |
| Index ranges                                                 | -23 ≤ <i>h</i> ≤ 28,<br>-25 ≤ <i>k</i> ≤ 26,<br>-33 ≤ <i>l</i> ≤ 32                 | -18 ≤ <i>h</i> ≤ 18,<br>-21 ≤ <i>k</i> ≤ 22,<br>-15 ≤ <i>l</i> ≤ 23                 |
| Reflections collected                                        | 83142                                                                               | 58907                                                                               |
| Independent reflections                                      | 23912<br>[ <i>R</i> <sub>int</sub> = 0.0376, <i>R</i> <sub>sigma</sub> =<br>0.0366] | 18569<br>[ <i>R</i> <sub>int</sub> = 0.0480, <i>R</i> <sub>sigma</sub> =<br>0.0354] |
| Data/restraints/parameters                                   | 23912/584/1162                                                                      | 18569/108/959                                                                       |
| Goodness-of-fit on F <sup>2</sup>                            | 0.993                                                                               | 1.043                                                                               |
| Final <i>R</i> indexes [ <i>I</i> ≥ 2 $\sigma$ ( <i>I</i> )] | <i>R</i> <sub>1</sub> = 0.1026,<br><i>wR</i> <sub>2</sub> = 0.2768                  | <i>R</i> <sub>1</sub> = 0.0875,<br><i>wR</i> <sub>2</sub> = 0.2687                  |
| Final <i>R</i> indexes [all data]                            | <i>R</i> <sub>1</sub> = 0.1667,<br><i>wR</i> <sub>2</sub> = 0.3528                  | <i>R</i> <sub>1</sub> = 0.1091,<br><i>wR</i> <sub>2</sub> = 0.2983                  |
| Largest diff. peak/hole / e Å <sup>-3</sup>                  | 0.45/-0.23                                                                          | 1.05/-0.55                                                                          |

**Table S7. Selected bond distances (Å) and angles (°) for Al<sub>24</sub> and Al<sub>12</sub>.**

| Al <sub>24</sub>     |             |                          |            |
|----------------------|-------------|--------------------------|------------|
| Al1—O6               | 1.987 (4)   | Al6—O34                  | 1.839 (5)  |
| Al1—O12              | 1.881 (5)   | Al6—O36                  | 1.859 (5)  |
| Al1—O20              | 1.855 (4)   | Al7—O15                  | 1.883 (6)  |
| Al1—O22              | 1.874 (4)   | Al7—O16                  | 1.867 (4)  |
| Al1—O25              | 1.889 (6)   | Al7—O35                  | 1.861 (4)  |
| Al1—O30              | 1.927 (4)   | Al7—O37 <sup>i</sup>     | 1.867 (7)  |
| Al2—O4               | 1.972 (3)   | Al7—O38                  | 1.908 (5)  |
| Al2—O14              | 1.849 (4)   | Al8—O10                  | 1.850 (4)  |
| Al2—O15              | 1.869 (4)   | Al8—O13                  | 1.860 (4)  |
| Al2—O16              | 1.881 (5)   | Al8—O18                  | 1.860 (5)  |
| Al2—O18              | 1.875 (6)   | Al8—O19                  | 1.874 (4)  |
| Al2—O40              | 1.926 (4)   | Al8—O26                  | 1.957 (7)  |
| Al3—O1 <sup>i</sup>  | 1.868 (5)   | Al9—O3 <sup>i</sup>      | 1.958 (5)  |
| Al3—O5 <sup>i</sup>  | 1.915 (4)   | Al9—O11                  | 1.890 (5)  |
| Al3—O6               | 1.971 (4)   | Al9—O21                  | 1.854 (4)  |
| Al3—O9               | 1.887 (4)   | Al9—O23                  | 1.866 (4)  |
| Al3—O17              | 1.860 (5)   | Al9—O24                  | 1.919 (6)  |
| Al3—O20              | 1.849 (4)   | Al9—O37                  | 1.852 (5)  |
| Al4—O4               | 1.973 (3)   | Al10—O17                 | 1.865 (4)  |
| Al4—O7               | 1.914 (4)   | Al10—O25                 | 1.855 (5)  |
| Al4—O9 <sup>i</sup>  | 1.851 (5)   | Al10—O27                 | 1.942 (6)  |
| Al4—O14              | 1.885 (4)   | Al10—O32                 | 1.856 (4)  |
| Al4—O19              | 1.893 (5)   | Al11—O11                 | 1.823 (5)  |
| Al5—O12              | 1.856 (4)   | Al11—O23                 | 1.872 (4)  |
| Al5—O21 <sup>i</sup> | 1.898 (5)   | Al11—O28                 | 1.918 (5)  |
| Al5—O22              | 1.867 (6)   | Al11—O29                 | 1.859 (5)  |
| Al5—O31              | 1.908 (4)   | Al11—O34                 | 1.866 (5)  |
| Al5—O35              | 1.856 (4)   | Al12—O13                 | 1.886 (5)  |
| Al6—O8               | 1.835 (4)   | Al12—O29                 | 1.881 (5)  |
| Al6—O32              | 1.853 (5)   | Al12—O36                 | 1.869 (5)  |
| Al6—O33              | 1.939 (5)   | Al12—O39                 | 1.952 (5)  |
| O12—Al1—O6           | 99.72 (18)  | O15—Al7—O3               | 97.01 (18) |
| O12—Al1—O25          | 169.90 (18) | O15—Al7—O38              | 93.6 (2)   |
| O12—Al1—O30          | 93.0 (2)    | O16—Al7—O3               | 98.48 (16) |
| O20—Al1—O6           | 78.24 (15)  | O16—Al7—O15              | 76.80 (19) |
| O20—Al1—O12          | 95.4 (2)    | O16—Al7—O37 <sup>i</sup> | 94.5 (2)   |
| O20—Al1—O22          | 170.4 (2)   | O16—Al7—O38              | 93.65 (18) |
| O20—Al1—O25          | 93.9 (2)    | O35—Al7—O3               | 77.84 (16) |

|                                      |             |                           |             |
|--------------------------------------|-------------|---------------------------|-------------|
| O20—A11—O30                          | 90.70 (18)  | O35—A17—O15               | 94.0 (2)    |
| O22—A11—O6                           | 99.36 (16)  | O35—A17—O16               | 169.7 (2)   |
| O22—A11—O12                          | 75.7 (2)    | O35—A17—O37 <sup>i</sup>  | 94.2 (2)    |
| O22—A11—O25                          | 94.8 (2)    | O35—A17—O38               | 91.50 (19)  |
| O22—A11—O30                          | 93.43 (18)  | O37 <sup>i</sup> —A17—O3  | 78.4 (2)    |
| O25—A11—O6                           | 78.43 (18)  | O37 <sup>i</sup> —A17—O15 | 169.6 (2)   |
| O25—A11—O30                          | 90.7 (2)    | O37 <sup>i</sup> —A17—O38 | 92.7 (2)    |
| O30—A11—O6                           | 163.8 (2)   | O38—A17—O3                | 165.4 (2)   |
| O14—A12—O4                           | 78.49 (15)  | O10—A18—O4                | 99.45 (19)  |
| O14—A12—O15                          | 169.9 (3)   | O10—A18—O13               | 75.96 (17)  |
| O14—A12—O16                          | 93.8 (2)    | O10—A18—O18               | 170.26 (18) |
| O14—A12—O18                          | 94.5 (2)    | O10—A18—O19               | 94.08 (18)  |
| O14—A12—O40                          | 92.27 (18)  | O10—A18—O26               | 91.9 (2)    |
| O15—A12—O4                           | 99.26 (16)  | O13—A18—O4                | 99.42 (18)  |
| O15—A12—O16                          | 76.8 (2)    | O13—A18—O19               | 169.67 (19) |
| O15—A12—O18                          | 94.7 (2)    | O13—A18—O26               | 91.5 (2)    |
| O15—A12—O40                          | 91.94 (18)  | O18—A18—O4                | 78.8 (2)    |
| O16—A12—O4                           | 99.74 (17)  | O18—A18—O13               | 94.78 (18)  |
| O16—A12—O40                          | 93.3 (2)    | O18—A18—O19               | 95.00 (19)  |
| O18—A12—O4                           | 78.48 (18)  | O18—A18—O26               | 91.4 (2)    |
| O18—A12—O16                          | 171.00 (19) | O19—A18—O4                | 79.26 (18)  |
| O18—A12—O40                          | 90.0 (2)    | O19—A18—O26               | 91.6 (2)    |
| O40—A12—O4                           | 164.5 (2)   | O26—A18—O4                | 165.8 (2)   |
| O1 <sup>i</sup> —A13—O5 <sup>i</sup> | 94.1 (2)    | O11—A19—O3 <sup>i</sup>   | 99.81 (18)  |
| O1 <sup>i</sup> —A13—O6              | 99.65 (17)  | O11—A19—O24               | 93.1 (2)    |
| O1 <sup>i</sup> —A13—O9              | 75.80 (19)  | O21—A19—O3 <sup>i</sup>   | 80.55 (19)  |
| O5 <sup>i</sup> —A13—O6              | 163.6 (2)   | O21—A19—O11               | 94.8 (2)    |
| O9—A13—O5 <sup>i</sup>               | 92.51 (18)  | O21—A19—O23               | 169.5 (2)   |
| O9—A13—O6                            | 99.38 (15)  | O21—A19—O24               | 89.5 (2)    |
| O17—A13—O1 <sup>i</sup>              | 168.82 (17) | O23—A19—O3 <sup>i</sup>   | 98.46 (17)  |
| O17—A13—O5 <sup>i</sup>              | 89.9 (2)    | O23—A19—O11               | 74.97 (18)  |
| O17—A13—O6                           | 78.21 (18)  | O23—A19—O24               | 93.5 (2)    |
| O17—A13—O9                           | 93.6 (2)    | O24—A19—O3 <sup>i</sup>   | 164.3 (2)   |
| O20—A13—O1 <sup>i</sup>              | 96.1 (2)    | O37—A19—O3 <sup>i</sup>   | 79.3 (2)    |
| O20—A13—O5 <sup>i</sup>              | 91.05 (17)  | O37—A19—O11               | 169.6 (2)   |
| O20—A13—O6                           | 78.80 (16)  | O37—A19—O21               | 95.2 (2)    |
| O20—A13—O9                           | 171.3 (2)   | O37—A19—O23               | 94.90 (19)  |
| O20—A13—O17                          | 94.3 (2)    | O37—A19—O24               | 89.6 (2)    |
| O1—A14—O4                            | 98.52 (15)  | O8—A110—O6                | 99.35 (18)  |
| O1—A14—O7                            | 93.96 (17)  | O8—A110—O27               | 92.7 (2)    |
| O1—A14—O14                           | 170.9 (2)   | O17—A110—O6               | 78.1 (2)    |

|                           |             |              |             |
|---------------------------|-------------|--------------|-------------|
| O1—A14—O19                | 94.3 (2)    | O17—A110—O8  | 94.04 (18)  |
| O7—A14—O4                 | 164.5 (2)   | O17—A110—O27 | 90.8 (2)    |
| O9 <sup>i</sup> —A14—O1   | 76.92 (19)  | O25—A110—O6  | 79.7 (2)    |
| O9 <sup>i</sup> —A14—O4   | 99.25 (16)  | O25—A110—O8  | 170.75 (19) |
| O9 <sup>i</sup> —A14—O7   | 92.5 (2)    | O25—A110—O17 | 94.77 (19)  |
| O9 <sup>i</sup> —A14—O14  | 95.4 (2)    | O25—A110—O27 | 90.0 (2)    |
| O9 <sup>i</sup> —A14—O19  | 170.65 (19) | O25—A110—O32 | 95.87 (19)  |
| O14—A14—O4                | 77.62 (15)  | O27—A110—O6  | 164.15 (19) |
| O14—A14—O7                | 91.29 (17)  | O32—A110—O6  | 99.71 (19)  |
| O14—A14—O19               | 93.1 (2)    | O32—A110—O8  | 75.16 (17)  |
| O19—A14—O4                | 78.78 (17)  | O32—A110—O17 | 168.58 (19) |
| O19—A14—O7                | 91.20 (19)  | O32—A110—O27 | 93.3 (2)    |
| O12—A15—O3                | 98.75 (16)  | O11—A111—O2  | 98.9 (2)    |
| O12—A15—O21 <sup>i</sup>  | 94.0 (2)    | O11—A111—O23 | 76.42 (19)  |
| O12—A15—O22               | 76.4 (2)    | O11—A111—O28 | 93.3 (2)    |
| O12—A15—O31               | 93.15 (17)  | O11—A111—O29 | 93.4 (2)    |
| O12—A15—O35               | 170.3 (2)   | O11—A111—O34 | 170.7 (2)   |
| O21 <sup>i</sup> —A15—O3  | 79.26 (18)  | O23—A111—O2  | 99.16 (18)  |
| O21 <sup>i</sup> —A15—O31 | 90.0 (2)    | O23—A111—O28 | 93.7 (2)    |
| O22—A15—O3                | 98.16 (17)  | O28—A111—O2  | 164.0 (3)   |
| O22—A15—O21 <sup>i</sup>  | 169.7 (2)   | O29—A111—O2  | 78.75 (18)  |
| O22—A15—O31               | 94.3 (2)    | O29—A111—O23 | 169.3 (2)   |
| O31—A15—O3                | 164.4 (2)   | O29—A111—O28 | 90.4 (2)    |
| O35—A15—O3                | 78.25 (17)  | O29—A111—O34 | 94.4 (2)    |
| O35—A15—O21 <sup>i</sup>  | 94.5 (2)    | O34—A111—O2  | 77.7 (2)    |
| O35—A15—O22               | 94.8 (2)    | O34—A111—O23 | 95.4 (2)    |
| O35—A15—O31               | 91.56 (18)  | O34—A111—O28 | 91.7 (2)    |
| O8—A16—O2                 | 98.95 (19)  | O10—A112—O2  | 99.9 (2)    |
| O8—A16—O32                | 76.09 (17)  | O10—A112—O13 | 75.26 (18)  |
| O8—A16—O33                | 92.9 (2)    | O10—A112—O29 | 96.10 (19)  |
| O8—A16—O34                | 94.9 (2)    | O10—A112—O36 | 169.4 (2)   |
| O8—A16—O36                | 171.2 (2)   | O10—A112—O39 | 92.7 (2)    |
| O32—A16—O2                | 97.91 (19)  | O13—A112—O2  | 97.70 (18)  |
| O32—A16—O33               | 93.0 (2)    | O13—A112—O39 | 94.6 (2)    |
| O32—A16—O36               | 96.0 (2)    | O29—A112—O2  | 78.92 (18)  |
| O33—A16—O2                | 165.5 (2)   | O29—A112—O13 | 170.2 (2)   |
| O34—A16—O2                | 79.2 (2)    | O29—A112—O39 | 90.4 (2)    |
| O34—A16—O32               | 170.1 (2)   | O36—A112—O2  | 77.81 (19)  |
| O34—A16—O33               | 91.5 (2)    | O36—A112—O13 | 94.7 (2)    |
| O34—A16—O36               | 92.7 (2)    | O36—A112—O29 | 93.6 (2)    |
| O36—A16—O2                | 78.25 (19)  | O36—A112—O39 | 91.4 (2)    |
| O36—A16—O33               | 91.1 (2)    | O39—A112—O2  | 164.2 (2)   |

| Symmetry code: (i) $-x+1, -y+1, -z+1$ . |             |             |             |
|-----------------------------------------|-------------|-------------|-------------|
| $Al_{12}$                               |             |             |             |
| Al1—O1                                  | 1.946 (3)   | Al4—O10     | 1.936 (3)   |
| Al1—O3                                  | 1.861 (2)   | Al4—O11     | 1.878 (3)   |
| Al1—O4                                  | 1.871 (3)   | Al4—O12     | 1.874 (3)   |
| Al1—O22 <sup>i</sup>                    | 1.933 (3)   | Al4—O13     | 1.927 (3)   |
| Al1—O23 <sup>i</sup>                    | 1.876 (3)   | Al4—O15     | 1.861 (2)   |
| Al1—O24 <sup>i</sup>                    | 1.865 (2)   | Al4—O16     | 1.882 (3)   |
| Al2—O2                                  | 1.923 (3)   | Al5—O14     | 1.924 (3)   |
| Al2—O3                                  | 1.872 (3)   | Al5—O15     | 1.873 (3)   |
| Al2—O4                                  | 1.886 (2)   | Al5—O16     | 1.868 (3)   |
| Al2—O5                                  | 1.927 (2)   | Al5—O17     | 1.874 (2)   |
| Al2—O7                                  | 1.863 (3)   | Al5—O18     | 1.932 (3)   |
| Al2—O8                                  | 1.875 (3)   | Al5—O20     | 1.875 (2)   |
| Al3—O6                                  | 1.924 (2)   | Al6—O17     | 1.868 (2)   |
| Al3—O7                                  | 1.877 (3)   | Al6—O19     | 1.935 (3)   |
| Al3—O8                                  | 1.862 (3)   | Al6—O20     | 1.879 (3)   |
| Al3—O9                                  | 1.924 (3)   | Al6—O21     | 1.937 (3)   |
| Al3—O11                                 | 1.876 (3)   | Al6—O23     | 1.850 (2)   |
| Al3—O12                                 | 1.867 (2)   | Al6—O24     | 1.886 (3)   |
| O3—Al1—O1                               | 92.59 (12)  | O11—Al4—O10 | 91.85 (12)  |
| O3—Al1—O4                               | 77.94 (11)  | O11—Al4—O13 | 92.08 (12)  |
| O3—Al1—O22 <sup>i</sup>                 | 91.70 (11)  | O11—Al4—O16 | 99.69 (12)  |
| O3—Al1—O23 <sup>i</sup>                 | 98.37 (12)  | O12—Al4—O10 | 89.83 (12)  |
| O3—Al1—O24 <sup>i</sup>                 | 174.72 (13) | O12—Al4—O11 | 77.58 (11)  |
| O4—Al1—O1                               | 89.67 (12)  | O12—Al4—O13 | 168.76 (11) |
| O4—Al1—O22 <sup>i</sup>                 | 168.05 (11) | O12—Al4—O16 | 96.64 (12)  |
| O4—Al1—O23 <sup>i</sup>                 | 97.74 (12)  | O13—Al4—O10 | 86.06 (13)  |
| O22 <sup>i</sup> —Al1—O1                | 84.82 (12)  | O15—Al4—O10 | 91.16 (12)  |
| O23 <sup>i</sup> —Al1—O1                | 167.83 (12) | O15—Al4—O11 | 174.80 (12) |
| O23 <sup>i</sup> —Al1—O22 <sup>i</sup>  | 89.57 (12)  | O15—Al4—O12 | 98.18 (11)  |
| O24 <sup>i</sup> —Al1—O1                | 91.55 (11)  | O15—Al4—O13 | 92.36 (12)  |
| O24 <sup>i</sup> —Al1—O4                | 98.82 (11)  | O15—Al4—O16 | 77.66 (11)  |
| O24 <sup>i</sup> —Al1—O22 <sup>i</sup>  | 91.94 (12)  | O16—Al4—O10 | 167.75 (13) |
| O24 <sup>i</sup> —Al1—O23 <sup>i</sup>  | 77.83 (10)  | O16—Al4—O13 | 89.38 (13)  |
| O2—Al2—O5                               | 84.96 (12)  | O14—Al5—O18 | 84.83 (13)  |
| O3—Al2—O2                               | 93.01 (13)  | O15—Al5—O14 | 89.93 (12)  |
| O3—Al2—O4                               | 77.30 (10)  | O15—Al5—O17 | 99.27 (11)  |
| O3—Al2—O5                               | 91.07 (11)  | O15—Al5—O18 | 167.14 (12) |
| O3—Al2—O8                               | 98.64 (12)  | O15—Al5—O20 | 97.65 (12)  |
| O4—Al2—O2                               | 89.14 (11)  | O16—Al5—O14 | 91.64 (12)  |

|                                         |             |             |             |
|-----------------------------------------|-------------|-------------|-------------|
| O4—A12—O5                               | 166.68 (13) | O16—A15—O15 | 77.69 (11)  |
| O7—A12—O2                               | 91.27 (12)  | O16—A15—O17 | 175.27 (12) |
| O7—A12—O3                               | 174.75 (13) | O16—A15—O18 | 90.69 (12)  |
| O7—A12—O4                               | 99.73 (11)  | O16—A15—O20 | 99.70 (12)  |
| O7—A12—O5                               | 92.34 (12)  | O17—A15—O14 | 91.97 (12)  |
| O7—A12—O8                               | 77.39 (12)  | O17—A15—O18 | 92.66 (12)  |
| O8—A12—O2                               | 167.26 (13) | O17—A15—O20 | 77.01 (11)  |
| O8—A12—O4                               | 98.39 (12)  | O20—A15—O14 | 167.46 (12) |
| O8—A12—O5                               | 89.68 (12)  | O20—A15—O18 | 89.67 (12)  |
| O7—A13—O6                               | 89.86 (12)  | O17—A16—O19 | 92.89 (12)  |
| O7—A13—O9                               | 167.23 (14) | O17—A16—O20 | 77.05 (11)  |
| O8—A13—O6                               | 92.30 (12)  | O17—A16—O21 | 92.77 (11)  |
| O8—A13—O7                               | 77.38 (12)  | O17—A16—O24 | 99.16 (11)  |
| O8—A13—O9                               | 91.15 (13)  | O19—A16—O21 | 84.68 (12)  |
| O8—A13—O11                              | 174.68 (11) | O20—A16—O19 | 89.12 (12)  |
| O8—A13—O12                              | 98.14 (11)  | O20—A16—O21 | 167.82 (12) |
| O9—A13—O6                               | 84.95 (12)  | O20—A16—O24 | 98.74 (12)  |
| O11—A13—O6                              | 92.09 (11)  | O23—A16—O17 | 174.59 (12) |
| O11—A13—O7                              | 99.63 (12)  | O23—A16—O19 | 90.46 (12)  |
| O11—A13—O9                              | 92.23 (13)  | O23—A16—O20 | 98.77 (12)  |
| O12—A13—O6                              | 168.10 (13) | O23—A16—O21 | 91.76 (11)  |
| O12—A13—O7                              | 97.96 (11)  | O23—A16—O24 | 77.94 (11)  |
| O12—A13—O9                              | 89.12 (12)  | O24—A16—O19 | 166.81 (11) |
| O12—A13—O11                             | 77.82 (11)  | O24—A16—O21 | 89.38 (12)  |
| Symmetry code: (i) $-x+1, -y+1, -z+2$ . |             |             |             |
